# Supplementary material
Source: PubMed Central journal article supplement (PMC8370200)
Supplement: aac.00462-21-s0001.pdf [file aac.00462-21-s0001.pdf]

Supplementary Table 1. Results of propensity score matched analysis

|                                                                                                                                                                                                                                                                                                                                                                                                                                                                                                                                                                        | <b>Control group<br/>(n=96)</b> | <b>Melatonin<br/>group (n=96)</b> | <b>p-value</b> |
|------------------------------------------------------------------------------------------------------------------------------------------------------------------------------------------------------------------------------------------------------------------------------------------------------------------------------------------------------------------------------------------------------------------------------------------------------------------------------------------------------------------------------------------------------------------------|---------------------------------|-----------------------------------|----------------|
| Acute kidney injury (n, %)                                                                                                                                                                                                                                                                                                                                                                                                                                                                                                                                             | 20 (20.8)                       | 8 (8.3)                           | 0.014          |
| Scr > 0.3 mg/dL from baseline                                                                                                                                                                                                                                                                                                                                                                                                                                                                                                                                          | 19 (19.8)                       | 8 (8.3)                           | 0.022          |
| Scr increase greater than 50% from baseline                                                                                                                                                                                                                                                                                                                                                                                                                                                                                                                            | 9 (9.4)                         | 5 (5.2)                           | 0.267          |
| Length of stay (days, mean ± SD)                                                                                                                                                                                                                                                                                                                                                                                                                                                                                                                                       | 9.2 ± 9.2                       | 10.8 ± 11.6                       | 0.307          |
| Area under the curve (mg·hr/L, mean ± SD)                                                                                                                                                                                                                                                                                                                                                                                                                                                                                                                              | 479.7 ± 179.7                   | 484.9 ± 260.8                     | 0.873          |
| Initial Trough (mcg/mL, mean ± SD)                                                                                                                                                                                                                                                                                                                                                                                                                                                                                                                                     | 16.5 ± 6.5                      | 16.7 ± 6.7                        | 0.895          |
| Change in Creatinine Clearance from baseline<br>(mL/min, median [IQR])                                                                                                                                                                                                                                                                                                                                                                                                                                                                                                 | 2.6 [14.2]                      | 11.0 [28.9]                       | 0.061          |
| Change in sCr from baseline (mg/dL, mean ±<br>SD)                                                                                                                                                                                                                                                                                                                                                                                                                                                                                                                      | 0.1 ± 0.4                       | -0.1 ± 0.4                        | 0.005          |
| <p>Notes: Propensity score matching included obesity, loop diuretics, piperacillin-tazobactam, age greater than 64 years, vancomycin dose greater than 3999 mg, area under the curve greater than 600 mg·hr/L, baseline creatinine clearance greater than 60 mL/min, intensive care unit admission, and Charlson Comorbidity Index greater than 3. We used the nearest neighbor approach without replacement and a caliper of 0.2. Standardized mean biases were tested and visually inspected using a dot plot to ensure adequate balance between the two groups.</p> |                                 |                                   |                |
